# Supplementary material for: Immediate impacts of soybean cover crop on bacterial community composition and diversity in soil under long-term Saccharum monoculture
Source: PeerJ. 2023 Aug 22;11:e15754. doi: 10.7717/peerj.15754 (PMC10452624; doi:10.7717/peerj.15754)
Supplement: Supplemental Information 1 [file peerj-11-15754-s001.xlsx]

## Sheet: Sheet1
Soil Parameters
					Total Exchange Capacity (meq/100 g)	pH	Organic Matter (%)	Estimated Nitrogen Release (#'s N/acre)	S* (ppm)	P* (mg/kg)	Ca* (mg/kg)	Mg* (mg/kg)	K* (mg/kg)	Na* (mg/kg)	Ca** (%)	Mg** (%)	K** (%)	Na** (%)	Other Bases** (%)
	T	SS			CEC	pH	OM	ENR	S	P	Ca1	Mg1	K1	Na1	Ca2	Mg2	K2	Na2	OB
soybean1	SB	1	soybean1	SB1	15.14	5.8	1.85	57	5	21	1629	321	67	21	53.8	17.67	1.13	0.6	5.8
soybean2	SB	2	soybean2	SB2	11.98	6.3	1.69	54	5	12	1518	272	51	29	63.36	18.92	1.09	1.05	5.1
soybean3	SB	3	soybean3	SB3	11.89	5.8	1.7	54	5	20	1281	247	57	21	53.87	17.31	1.23	0.77	5.8
sugarcane1	SC	1	sugarcane1	SC1	13.2	6.1	1.82	56	7	20	1539	330	81	18	58.3	20.83	1.57	0.59	5.2
sugarcane2	SC	2	sugarcane2	SC2	13.19	5.9	1.87	57	7	20	1441	313	74	17	54.62	19.78	1.44	0.56	5.6
sugarcane3	SC	3	sugarcane3	SC3	15.01	6.1	1.7	54	11	18	1749	375	86	25	58.26	20.82	1.47	0.72	5.2
fallow Soil1	FS	1	fallow Soil1	FS1	13.59	6	1.92	58	8	28	1588	300	104	26	58.43	18.4	1.96	0.83	5.4
fallow Soil2	FS	2	fallow Soil2	FS2	19.72	6.1	1.89	58	7	17	2334	467	115	40	59.18	19.73	1.5	0.88	5.2
fallow Soil3	FS	3	fallow Soil3	FS3	20.32	6.1	2.12	62	7	30	2420	472	135	33	59.55	19.36	1.7	0.71	5.2
